# Supplementary material for: Does Individuals’ Perception of Wastewater Pollution Decrease Their Self-Rated Health? Evidence from China
Source: MDPI journal article supplement (doi:10.3390/ijerph19127291), 2022-06-14
Supplement: s1 [file s1]

# Supplementary Materials

**Table S1**

Number of questionnaires and regional distribution

| Province<br>(Or equivalent) | City    | County    | Count<br>(County) | Count<br>(City) | Count<br>(Prov) | Total |
|-----------------------------|---------|-----------|-------------------|-----------------|-----------------|-------|
| Anhui                       | Anqing  | Huaining  | 1                 | 11              | 264             | 6112  |
|                             |         | Qianshan  | 1                 |                 |                 |       |
|                             |         | Susong    | 4                 |                 |                 |       |
|                             |         | Taihu     | 1                 |                 |                 |       |
|                             |         | Wangjiang | 4                 |                 |                 |       |
|                             | Bengbu  | Bengshan  | 9                 | 38              |                 |       |
|                             |         | Guzhen    | 2                 |                 |                 |       |
|                             |         | Huaiyuan  | 2                 |                 |                 |       |
|                             |         | Huaishang | 2                 |                 |                 |       |
|                             |         | Longzihu  | 21                |                 |                 |       |
|                             |         | Wuhe      | 1                 |                 |                 |       |
|                             |         | Yuhui     | 1                 |                 |                 |       |
|                             | Bozhou  | Lixin     | 9                 | 19              |                 |       |
|                             |         | Mengcheng | 1                 |                 |                 |       |
|                             |         | Qiaocheng | 5                 |                 |                 |       |
|                             |         | Guoyang   | 4                 |                 |                 |       |
|                             | Chizhou | Dongzhi   | 2                 | 4               |                 |       |
|                             |         | Guichi    | 2                 |                 |                 |       |
|                             | Chuzhou | Dingyuan  | 1                 | 25              |                 |       |
|                             |         | Fengyang  | 15                |                 |                 |       |
|                             |         | Lai'an    | 1                 |                 |                 |       |
|                             |         | Langya    | 1                 |                 |                 |       |
|                             |         | Mingguang | 2                 |                 |                 |       |
|                             |         | Nanqiao   | 1                 |                 |                 |       |
|                             |         | Quanjiao  | 2                 |                 |                 |       |
|                             |         | Tianchang | 1                 |                 |                 |       |
|                             |         | -         | 1                 |                 |                 |       |
|                             | Fuyang  | Linquan   | 18                | 35              |                 |       |
|                             |         | Yingzhou  | 4                 |                 |                 |       |
|                             |         | Jieshou   | 3                 |                 |                 |       |
|                             |         | Yingshang | 2                 |                 |                 |       |
|                             |         | Yingquan  | 2                 |                 |                 |       |
|                             |         | Funan     | 5                 |                 |                 |       |
|                             |         | Yingdong  | 1                 |                 |                 |       |
|                             | Hefei   | Luyang    | 6                 | 44              |                 |       |
|                             |         | Yaohai    | 10                |                 |                 |       |
|                             |         | Baohe     | 5                 |                 |                 |       |

|                |           |            |   |     |     |
|----------------|-----------|------------|---|-----|-----|
|                |           | Feidong    | 3 |     |     |
|                |           | Shushan    | 4 |     |     |
|                |           | Lujiang    | 7 |     |     |
|                |           | Feixi      | 6 |     |     |
|                |           | Chaohu     | 2 |     |     |
|                |           | Changfeng  | 1 |     |     |
|                | Huaibei   | Xiangshan  | 2 | 6   |     |
|                |           | Suixi      | 4 |     |     |
|                | Huainan   | Fengtai    | 4 | 7   |     |
|                |           | Bagongshan | 1 |     |     |
|                |           | Tianjiaan  | 1 |     |     |
|                |           | Datong     | 1 |     |     |
|                | Huangshan | Shexian    | 2 | 8   |     |
|                |           | Huangshan  | 1 |     |     |
|                |           | Xiuning    | 3 |     |     |
|                |           | Tunxi      | 2 |     |     |
|                | Lu'an     | Yeji       | 3 | 19  |     |
|                |           | Jinan      | 4 |     |     |
|                |           | Jinzhai    | 1 |     |     |
|                |           | Yu'an      | 3 |     |     |
|                |           | Huoqiu     | 2 |     |     |
|                |           | Huoshan    | 3 |     |     |
|                |           | Shucheng   | 2 |     |     |
|                |           | -          | 1 |     |     |
|                | Ma'anshan | Yushan     | 1 | 5   |     |
|                |           | Huashan    | 2 |     |     |
|                |           | Hexian     | 1 |     |     |
|                |           | Dangtu     | 1 |     |     |
|                | Suzhou    | Yongqiao   | 6 | 18  |     |
|                |           | Xiao       | 4 |     |     |
|                |           | Lingbi     | 5 |     |     |
|                |           | Dangshan   | 3 |     |     |
|                | Tongling  | Yi'an      | 1 | 6   |     |
|                |           | Tongguan   | 2 |     |     |
|                |           | Zongyang   | 3 |     |     |
|                | Wuhu      | Jinghu     | 1 | 12  |     |
|                |           | Yijiang    | 2 |     |     |
|                |           | Wuwei      | 7 |     |     |
|                |           | Nanling    | 2 |     |     |
|                | Xuancheng | Ningguo    | 1 | 7   |     |
|                |           | Langxi     | 3 |     |     |
|                |           | Xuanzhou   | 2 |     |     |
|                |           | -          | 1 |     |     |
| <b>Beijing</b> | Beijing   | Fangshan   | 2 | 224 | 224 |

|                  |           |             |     |     |     |
|------------------|-----------|-------------|-----|-----|-----|
|                  |           | Xicheng     | 4   |     |     |
|                  |           | Chaoyang    | 2   |     |     |
|                  |           | Haidian     | 7   |     |     |
|                  |           | Tongzhou    | 2   |     |     |
|                  |           | Shijingshan | 1   |     |     |
|                  |           | Dongcheng   | 2   |     |     |
|                  |           | Miyun       | 1   |     |     |
|                  |           | -           | 203 |     |     |
| <b>Fujian</b>    | Fuzhou    | Luoyuan     | 1   | 229 | 447 |
|                  |           | Fuqing      | 227 |     |     |
|                  |           | -           | 1   |     |     |
|                  | Nanping   | Jian'ou     | 1   | 5   |     |
|                  |           | Shunchang   | 1   |     |     |
|                  |           | Yanping     | 1   |     |     |
|                  |           | Songxi      | 1   |     |     |
|                  |           | Shaowu      | 1   |     |     |
|                  | Ningde    | Xiapu       | 1   | 3   |     |
|                  |           | Fu'an       | 1   |     |     |
|                  |           | Fuding      | 1   |     |     |
|                  | Putian    | Xianyou     | 2   | 2   |     |
|                  | Quanzhou  | Yongchun    | 1   | 1   |     |
|                  | Sanming   | Mingxi      | 1   | 2   |     |
|                  |           | Qingliu     | 1   |     |     |
|                  | Xiamen    | Tong'an     | 1   | 2   |     |
|                  |           | -           | 1   |     |     |
|                  | Zhangzhou | Changtai    | 200 | 203 |     |
|                  |           | Longhai     | 1   |     |     |
|                  |           | -           | 2   |     |     |
| <b>Gansu</b>     | Qingyang  | Huan        | 208 | 208 | 230 |
|                  | Zhangye   | Minle       | 1   | 1   |     |
|                  | Dingxi    | Weiyuan     | 1   | 1   |     |
|                  | Gannan    | Zhuoni      | 1   | 2   |     |
|                  |           | Lintan      | 1   |     |     |
|                  | Tianshui  | Qingshui    | 1   | 1   |     |
|                  | Baiyin    | Huining     | 2   | 4   |     |
|                  |           | -           | 2   |     |     |
|                  | Lanzhou   | -           | 7   | 7   |     |
|                  | Linxia    | Linxia      | 1   | 2   |     |
|                  |           | Guanghe     | 1   |     |     |
|                  | Pingliang | Kongtong    | 1   | 3   |     |
|                  |           | -           | 2   |     |     |
|                  | Wuwei     | -           | 1   | 1   |     |
| <b>Guangdong</b> | Chaozhou  | Raoping     | 2   | 2   | 233 |

|         |           |            |     |     |     |
|---------|-----------|------------|-----|-----|-----|
|         | Dongguan  | -          | 11  | 11  |     |
|         | Foshan    | Shunde     | 9   | 10  |     |
|         |           | Nanhai     | 1   |     |     |
|         | Guangzhou | Baiyun     | 2   | 28  |     |
|         |           | Huangpu    | 6   |     |     |
|         |           | Panyu      | 6   |     |     |
|         |           | Tianhe     | 7   |     |     |
|         |           | Huadu      | 1   |     |     |
|         |           | Zengcheng  | 1   |     |     |
|         |           | Liwan      | 3   |     |     |
|         |           | Haizhu     | 1   |     |     |
|         |           | Yuxiu      | 1   |     |     |
|         | Heyuan    | Longchuan  | 1   | 1   |     |
|         | Huizhou   | Huiyang    | 106 | 121 |     |
|         |           | Huidong    | 4   |     |     |
|         |           | Huicheng   | 11  |     |     |
|         | Jieyang   | Jiedong    | 2   | 6   |     |
|         |           | Huilai     | 2   |     |     |
|         |           | Puning     | 1   |     |     |
|         |           | -          | 1   |     |     |
|         | Meizhou   | Wuhua      | 2   | 4   |     |
|         |           | Meijiang   | 1   |     |     |
|         |           | Jiaoling   | 1   |     |     |
|         | Qingyuan  | Yingde     | 3   | 3   |     |
|         | Shantou   | Jinping    | 1   | 2   |     |
|         |           | Longhu     | 1   |     |     |
|         | Shanwei   | Lufeng     | 1   | 1   |     |
|         | Shaoguan  | Zhenjiang  | 1   | 1   |     |
|         | Shenzhen  | Longhua    | 1   | 26  |     |
|         |           | Luohu      | 1   |     |     |
|         |           | Longgang   | 9   |     |     |
|         |           | Futian     | 6   |     |     |
|         |           | Baoan      | 2   |     |     |
|         |           | Pingshan   | 3   |     |     |
|         |           | Nanshan    | 3   |     |     |
|         |           | -          | 1   |     |     |
|         | Yangjiang | Yangxi     | 1   | 15  |     |
|         |           | Jiangcheng | 14  |     |     |
|         | Zhongshan | -          | 1   | 1   |     |
|         | Zhuhai    | Xiangzhou  | 1   | 1   |     |
| Guangxi | Baise     | Jingxi     | 1   | 15  | 255 |
|         |           | Pingguo    | 3   |     |     |
|         |           | Xilin      | 5   |     |     |

|                |             |             |     |     |     |
|----------------|-------------|-------------|-----|-----|-----|
|                |             | Longlin     | 1   |     |     |
|                |             | Jingxi      | 2   |     |     |
|                |             | Lingyun     | 1   |     |     |
|                |             | -           | 2   |     |     |
|                | Guigang     | Guiping     | 1   | 1   |     |
|                | Guilin      | Resource    | 1   | 13  |     |
|                |             | Xing'an     | 1   |     |     |
|                |             | Pingle      | 6   |     |     |
|                |             | -           | 5   |     |     |
|                | Hechi       | Luocheng    | 1   | 212 |     |
|                |             | Du'an       | 1   |     |     |
|                |             | Huanjiang   | 6   |     |     |
|                |             | -           | 204 |     |     |
|                | Laibin      | Xiangzhou   | 1   | 1   |     |
|                | Liuzhou     | Rong'an     | 1   | 1   |     |
|                | Nanning     | Qingxiu     | 1   | 10  |     |
|                |             | Xixiangtang | 1   |     |     |
|                |             | Binyang     | 1   |     |     |
|                |             | Wuming      | 1   |     |     |
|                |             | -           | 6   |     |     |
|                | -           | -           | 2   | 2   |     |
| <b>Guizhou</b> | Anshun      | Zhenning    | 3   | 331 | 507 |
|                |             | Ziyun       | 1   |     |     |
|                |             | -           | 327 |     |     |
|                | Bijie       | Weining     | 140 | 141 |     |
|                |             | Qianxi      | 1   |     |     |
|                | Guiyang     | -           | 3   | 3   |     |
|                | Liupanshui  | Liuzhi      | 1   | 14  |     |
|                |             | Panzhou     | 2   |     |     |
|                |             | -           | 11  |     |     |
|                | Qiandongnan | Kaili       | 1   | 2   |     |
|                |             | -           | 1   |     |     |
|                | Qiannan     | Fuquan      | 1   | 4   |     |
|                |             | Dushan      | 2   |     |     |
|                |             | -           | 1   |     |     |
|                | Qianxinan   | Xingren     | 2   | 4   |     |
|                |             | Pu'an       | 1   |     |     |
|                |             | Xingyi      | 1   |     |     |
|                | Tongren     | Jiangkou    | 1   | 2   |     |
|                |             | Yanhe       | 1   |     |     |
|                | Zunyi       | Wuchuan     | 1   | 3   |     |
|                |             | Chishui     | 1   |     |     |
|                |             | -           | 1   |     |     |

|               |              |           |     |     |     |
|---------------|--------------|-----------|-----|-----|-----|
|               | -            | -         | 3   | 3   |     |
| <b>Hainan</b> | Baisha       | -         | 10  | 10  | 65  |
|               | Changjiang   | -         | 2   | 2   |     |
|               | Chengmai     | -         | 4   | 4   |     |
|               | Danzhou      | -         | 3   | 3   |     |
|               | Dongfang     | -         | 1   | 1   |     |
|               | Haikou       | Longhua   | 9   | 31  |     |
|               |              | Meilan    | 8   |     |     |
|               |              | Qiongshan | 7   |     |     |
|               |              | Xiuying   | 7   |     |     |
|               | Lingshui     | -         | 2   | 2   |     |
|               | Qionghai     | -         | 3   | 3   |     |
|               | Sanya        | Tianya    | 1   | 4   |     |
|               |              | Jiyang    | 2   |     |     |
|               |              | Haitang   | 1   |     |     |
|               | Wanning      | -         | 1   | 1   |     |
|               | Wenchang     | -         | 3   | 3   |     |
|               | -            | -         | 1   | 1   |     |
| <b>Hebei</b>  | Baoding      | Yi        | 3   | 8   | 241 |
|               |              | Quyang    | 1   |     |     |
|               |              | -         | 4   |     |     |
|               | Cangzhou     | Hejian    | 2   | 2   |     |
|               | Chengde      | Luanping  | 1   | 1   |     |
|               | Handan       | Qiu       | 1   | 4   |     |
|               |              | Cheng'an  | 2   |     |     |
|               |              | Hanshan   | 1   |     |     |
|               | Hengshui     | Taocheng  | 1   | 4   |     |
|               |              | Shen Zhou | 1   |     |     |
|               |              | -         | 2   |     |     |
|               | Langfang     | Sanhe     | 1   | 2   |     |
|               | Qinhuangdao  | Funing    | 1   |     |     |
|               | Shijiazhuang | Zhengding | 1   | 3   |     |
|               |              | Xinhua    | 1   |     |     |
|               |              | -         | 1   |     |     |
|               | Tangshan     | Kaiping   | 1   | 3   |     |
|               |              | -         | 2   |     |     |
|               | Xingtai      | Pingxiang | 212 | 213 |     |
|               |              | -         | 1   |     |     |
|               | Zhangjiakou  | -         | 1   | 1   |     |
| <b>Henan</b>  | Hebi         | Qi        | 1   | 2   | 74  |
|               |              | Qibin     | 1   |     |     |
|               | Jiyuan       | -         | 1   | 1   |     |

|                     |              |             |     |     |     |
|---------------------|--------------|-------------|-----|-----|-----|
|                     | Jiaozuo      | Xiuwu       | 1   | 3   |     |
|                     |              | Jiefang     | 1   |     |     |
|                     |              | -           | 1   |     |     |
|                     | Kaifeng      | Tongxu      | 1   | 4   |     |
|                     |              | Longting    | 2   |     |     |
|                     |              | -           | 1   |     |     |
|                     | Luoyang      | Yiyang      | 1   | 2   |     |
|                     |              | Luolong     | 1   |     |     |
|                     | Luohe        | Zhaoling    | 1   | 1   |     |
|                     | Nanyang      | Xixia       | 1   | 5   |     |
|                     |              | Nanzhao     | 1   |     |     |
|                     |              | Xinye       | 2   |     |     |
|                     |              | Wancheng    | 1   |     |     |
|                     | Pingdingshan | Ye          | 1   | 1   |     |
|                     | Shangqiu     | Yongcheng   | 1   | 3   |     |
|                     |              | Minquan     | 1   |     |     |
|                     |              | Liangyuan   | 1   |     |     |
|                     | Xinxiang     | Xinxiang    | 1   | 2   |     |
|                     |              | Fengqiu     | 1   |     |     |
|                     | Xinyang      | Xin         | 1   | 28  |     |
|                     |              | Shangcheng  | 2   |     |     |
|                     |              | Shihe       | 2   |     |     |
|                     |              | Gushi       | 23  |     |     |
|                     | Zhengzhou    | Zhongyuan   | 5   | 17  |     |
|                     |              | Erqi        | 3   |     |     |
|                     |              | Jinshui     | 8   |     |     |
|                     |              | -           | 1   |     |     |
|                     | Zhoukou      | Huaiyang    | 1   | 3   |     |
|                     |              | Chuanhui    | 1   |     |     |
|                     |              | -           | 1   |     |     |
|                     | Zhumadian    | Pingyu      | 1   | 1   |     |
|                     | -            | -           | 1   | 1   |     |
| <b>Heilongjiang</b> | Daqing       | -           | 2   | 2   | 330 |
|                     | Harbin       | Shuangcheng | 1   | 47  |     |
|                     |              | Daowai      | 1   |     |     |
|                     |              | Acheng      | 1   |     |     |
|                     |              | -           | 44  |     |     |
|                     | Hegang       | Nanshan     | 1   | 206 |     |
|                     |              | -           | 205 |     |     |
|                     | Jiamusi      | -           | 71  | 71  |     |
|                     | Mudanjiang   | Ning'an     | 1   | 2   |     |
|                     |              | -           | 1   |     |     |
|                     | Qiqihar      | Gannan      | 1   | 1   |     |

|              |             |             |     |     |     |
|--------------|-------------|-------------|-----|-----|-----|
|              | Suihua      | Lanxi       | 1   | 1   |     |
| <b>Hubei</b> | Enshi       | Badong      | 3   | 14  | 71  |
|              |             | Xuanen      | 4   |     |     |
|              |             | Enshi       | 2   |     |     |
|              |             | Jianshi     | 2   |     |     |
|              |             | -           | 3   |     |     |
|              | Huanggang   | Huangzhou   | 1   | 3   |     |
|              |             | Wuxue       | 2   |     |     |
|              | Lichuan     | -           | 1   | 1   |     |
|              | Shiyan      | Danjiangkou | 7   | 7   |     |
|              | Suizhou     | Zengdu      | 12  | 24  |     |
|              |             | Sui         | 12  |     |     |
|              | Tianmen     | -           | 1   | 1   |     |
|              | Wuhan       | Wuchang     | 1   | 12  |     |
|              |             | Huangpi     | 4   |     |     |
|              |             | Hongshan    | 6   |     |     |
|              |             | Jiangxia    | 1   |     |     |
|              | Xianning    | Tongcheng   | 2   | 3   |     |
|              |             | -           | 1   |     |     |
|              | Xiangyang   | Zaoyang     | 1   | 2   |     |
|              |             | -           | 1   |     |     |
|              | Yichang     | Dianjun     | 1   | 2   |     |
|              |             | -           | 1   |     |     |
|              | -           | -           | 2   | 2   |     |
| <b>Hunan</b> | Changde     | Shimen      | 222 | 225 | 246 |
|              |             | -           | 3   |     |     |
|              | Chenzhou    | Zixing      | 1   | 2   |     |
|              |             | Yizhang     | 1   |     |     |
|              | Loudi       | Louxing     | 1   | 1   |     |
|              | Shaoyang    | Chengbu     | 1   | 3   |     |
|              |             | Longhui     | 1   |     |     |
|              |             | Shaodong    | 1   |     |     |
|              | Xiangxi     | Baojing     | 1   | 2   |     |
|              |             | Yongshun    | 1   |     |     |
|              | Yongzhou    | Jianghua    | 1   | 2   |     |
|              |             | Ningyuan    | 1   |     |     |
|              | Zhangjiajie | Cili        | 1   | 3   |     |
|              |             | -           | 2   |     |     |
|              | Changsha    | Yuelu       | 1   | 6   |     |
|              |             | Ningxiang   | 1   |     |     |
|              |             | Hengshan    | 1   |     |     |
|              |             | -           | 3   |     |     |
|              | -           | -           | 2   | 3   |     |



|                |             |                   |    |    |     |
|----------------|-------------|-------------------|----|----|-----|
| <b>Jilin</b>   | Baicheng    | -                 | 2  | 2  | 70  |
|                | Changchun   | Chaoyang          | 1  | 3  |     |
|                |             | Nong'an           | 1  |    |     |
|                |             | -                 | 1  |    |     |
|                | Dunhua      | -                 | 1  | 1  |     |
|                | Siping      | Lishu             | 5  | 55 |     |
|                |             | Yitong            | 2  |    |     |
|                |             | Manchu Autonomous |    |    |     |
|                |             | Tiexi             | 3  |    |     |
|                |             | Tiedong           | 34 |    |     |
|                |             | -                 | 11 |    |     |
|                | Songyuan    | Ningjiang         | 1  | 3  |     |
|                |             | Changling         | 1  |    |     |
|                |             | -                 | 1  |    |     |
|                | Yanbian     | Yanji             | 2  | 3  |     |
|                |             | Hunchun           | 1  |    |     |
|                | Liaoyuan    | Dongliao          | 1  | 1  |     |
|                | -           | -                 | 2  | 2  |     |
| <b>Jiangsu</b> | Changzhou   | Wujin             | 9  | 32 | 134 |
|                |             | Tianning          | 9  |    |     |
|                |             | Zhonglou          | 4  |    |     |
|                |             | Xinbei            | 8  |    |     |
|                |             | Jintan            | 1  |    |     |
|                |             | Liyang            | 1  |    |     |
|                | Huai'an     | Huaiyin           | 1  | 2  |     |
|                |             | Lianshui          | 1  |    |     |
|                | Lianyungang | Haizhou           | 2  | 3  |     |
|                |             | Lianyun           | 1  |    |     |
|                | Nanjing     | Qixia             | 12 | 29 |     |
|                |             | Liuhe             | 1  |    |     |
|                |             | Gulou             | 5  |    |     |
|                |             | Jiangning         | 4  |    |     |
|                |             | Xuanwu            | 4  |    |     |
|                |             | -                 | 3  |    |     |
|                | Nantong     | Qidong            | 1  | 3  |     |
|                |             | Rugao             | 1  |    |     |
|                |             | Rudong            | 1  |    |     |
|                | Suzhou      | Wujiang           | 1  | 29 |     |
|                |             | Wuzhong           | 9  |    |     |
|                |             | Gusu              | 13 |    |     |
|                |             | Xiangcheng        | 2  |    |     |
|                |             | Zhangjiagang      | 1  |    |     |
|                |             | Huqiu             | 3  |    |     |

|                 |            |              |    |    |    |
|-----------------|------------|--------------|----|----|----|
|                 | Taizhou    | Taixing      | 1  | 1  |    |
|                 | Wuxi       | Binhu        | 11 | 24 |    |
|                 |            | Liangxi      | 4  |    |    |
|                 |            | Xinwu        | 5  |    |    |
|                 |            | Huishan      | 3  |    |    |
|                 |            | Xishan       | 1  |    |    |
|                 | Xuzhou     | Suining      | 1  | 1  |    |
|                 | Yancheng   | Dongtai      | 1  | 1  |    |
|                 | Zhenjiang  | Yangzhong    | 6  | 9  |    |
|                 |            | Runzhou      | 2  |    |    |
|                 |            | -            | 1  |    |    |
| <b>Jiangxi</b>  | Ganzhou    | Xunwu        | 1  | 2  | 43 |
|                 |            | Zhanggong    | 1  |    |    |
|                 | Ji'an      | Suichuan     | 1  | 15 |    |
|                 |            | Xingan       | 1  |    |    |
|                 |            | Ji'an        | 11 |    |    |
|                 |            | Jinggangshan | 1  |    |    |
|                 |            | Yongxin      | 1  |    |    |
|                 | Jingdezhen | Zhushan      | 3  | 5  |    |
|                 |            | Fuliang      | 1  |    |    |
|                 |            | Changjiang   | 1  |    |    |
|                 | Jiujiang   | -            | 1  | 1  |    |
|                 | Nanchang   | Qingyunpu    | 2  | 17 |    |
|                 |            | Donghu       | 5  |    |    |
|                 |            | Xinjian      | 5  |    |    |
|                 |            | Qingshanhu   | 3  |    |    |
|                 |            | Anyi         | 1  |    |    |
|                 |            | -            | 1  |    |    |
|                 | Yichun     | Gao'an       | 1  | 1  |    |
|                 | Yingtian   | Yujiang      | 1  | 1  |    |
|                 | Shangrao   | -            | 1  | 1  |    |
| <b>Liaoning</b> | Chaoyang   | Jianping     | 3  | 3  | 69 |
|                 | Dalian     | Zhongshan    | 3  | 47 |    |
|                 |            | Ganjingzi    | 18 |    |    |
|                 |            | Xigang       | 3  |    |    |
|                 |            | Jinzhou      | 8  |    |    |
|                 |            | Zhuanghe     | 4  |    |    |
|                 |            | Shahekou     | 6  |    |    |
|                 |            | Wafangdian   | 2  |    |    |
|                 |            | Pulandian    | 2  |    |    |
|                 |            | -            | 1  |    |    |
|                 | Dandong    | Zhen'an      | 1  | 4  |    |
|                 |            | Zhenxin      | 1  |    |    |

|                |                 |                        |    |     |     |
|----------------|-----------------|------------------------|----|-----|-----|
|                |                 | Donggang               | 1  |     |     |
|                |                 | -                      | 1  |     |     |
|                | Fushun          | -                      | 1  | 1   |     |
|                | Fuxin           | Qinghemmen             | 1  | 1   |     |
|                | Huludao         | Suizhong               | 1  | 1   |     |
|                | Shenyang        | Liaozhong              | 3  | 10  |     |
|                |                 | Huanggu                | 1  |     |     |
|                |                 | Tiexi                  | 2  |     |     |
|                |                 | Faku                   | 1  |     |     |
|                |                 | Hunnan                 | 1  |     |     |
|                |                 | -                      | 2  |     |     |
|                | Tieling         | Yinzhou                | 1  | 1   |     |
|                | Yingkou         | Gaizhou                | 1  | 1   |     |
| Inner Mongolia | Bayan Nur       | Urad Front Banner      | 1  | 3   | 231 |
|                |                 | -                      | 2  |     |     |
|                | Baotou          | -                      | 2  | 2   |     |
|                | Chifeng         | Balin Right Banner     | 1  | 14  |     |
|                |                 | Ningcheng              | 1  |     |     |
|                |                 | Aohan Banner           | 2  |     |     |
|                |                 | Wudan                  | 1  |     |     |
|                |                 | Songshan               | 1  |     |     |
|                |                 | -                      | 8  |     |     |
|                | Hohhot          | Tokto                  | 1  | 3   |     |
|                |                 | -                      | 2  |     |     |
|                | Hulun Buir      | Xin Barag Right Banner | 1  | 3   |     |
|                |                 | Zhalantun              | 1  |     |     |
|                |                 | -                      | 1  |     |     |
|                | Tongliao        | Kulun Banner           | 1  | 4   |     |
|                |                 | Jarud Banner           | 1  |     |     |
|                |                 | -                      | 2  |     |     |
|                | Ulanqab         | Shangdu                | 2  | 4   |     |
|                |                 | Liangcheng             | 1  |     |     |
|                |                 | -                      | 1  |     |     |
|                | Xilingol League | Abaga Banner           | 1  | 137 |     |
|                |                 | East Ujimqin banner    | 5  |     |     |
|                |                 | Duolun                 | 6  |     |     |
|                |                 | Erenhot                | 2  |     |     |
|                |                 | Sonid Right Banner     | 25 |     |     |
|                |                 | Sonid Left Banner      | 1  |     |     |
|                |                 | Taibus Banner          | 8  |     |     |
|                |                 | West Ujimqin banner    | 2  |     |     |
|                |                 | Xilinhot               | 52 |     |     |

|                 |                |                 |        |     |     |
|-----------------|----------------|-----------------|--------|-----|-----|
|                 |                | Boarder         | Yellow | 4   |     |
|                 |                | Banner          |        |     |     |
|                 |                | Zhenglan Banner |        | 14  |     |
|                 |                | Zhengxiangbai   |        | 4   |     |
|                 |                | Banner          |        |     |     |
|                 |                | -               |        | 13  |     |
|                 | Hinggan League | Ulanhot         |        | 1   | 1   |
|                 | -              | -               |        | 60  | 60  |
| <b>Ningxia</b>  | Guyuan         | Pengyang        |        | 1   | 5   |
|                 |                | -               |        | 4   |     |
|                 | Shizuishan     | Dawukou         |        | 3   | 3   |
|                 | Wuzhong        | Tongxin         |        | 2   | 4   |
|                 |                | -               |        | 2   |     |
|                 | Yinchuan       | Xingqing        |        | 1   | 222 |
|                 |                | -               |        | 221 |     |
|                 | Zhongwei       | Shapotou        |        | 1   | 2   |
|                 |                | -               |        | 1   |     |
|                 | -              | -               |        | 1   | 1   |
| <b>Qinghai</b>  | Haidong        | Huzhu           |        | 1   | 125 |
|                 |                | Minhe           |        | 4   |     |
|                 |                | Ping'an         |        | 2   |     |
|                 |                | Hualong         |        | 118 |     |
|                 | Haibei         | Menyuan         |        | 6   | 7   |
|                 |                | Qilian          |        | 1   |     |
|                 | Haixi          | Golmud          |        | 2   | 3   |
|                 |                | Delhi city      |        | 1   |     |
|                 | Huangnan       | Jianzha         |        | 3   | 3   |
|                 | Xining         | Chengbei        |        | 3   | 75  |
|                 |                | Chengdong       |        | 18  |     |
|                 |                | Chengxi         |        | 12  |     |
|                 |                | Urban           |        | 11  |     |
|                 |                | Datong          |        | 11  |     |
|                 |                | Huangzhong      |        | 12  |     |
|                 |                | -               |        | 8   |     |
|                 | Yushu          | -               |        | 1   | 1   |
| <b>Shandong</b> | Dezhou         | Linyi           |        | 2   | 4   |
|                 |                | -               |        | 2   |     |
|                 | Heze           | -               |        | 1   | 1   |
|                 | Jining         | Liangshan       |        | 1   | 3   |
|                 |                | Weishan         |        | 1   |     |
|                 |                | -               |        | 1   |     |
|                 | Liaocheng      | Linjing         |        | 1   | 1   |
|                 | Linyi          | Pingyi          |        | 1   | 3   |

|                |          |           |     |     |     |
|----------------|----------|-----------|-----|-----|-----|
|                |          | -         | 2   |     |     |
|                | Qingdao  | Licang    | 1   | 3   |     |
|                |          | Shinan    | 1   |     |     |
|                |          | -         | 1   |     |     |
|                | Rizhao   | Wulian    | 1   | 2   |     |
|                |          | Donggang  | 1   |     |     |
|                | Weihai   | Rongcheng | 2   | 305 |     |
|                |          | -         | 303 |     |     |
|                | Weifang  | Qingzhou  | 1   | 2   |     |
|                |          | Anqiu     | 1   |     |     |
|                | Yantai   | Longkou   | 1   | 4   |     |
|                |          | -         | 3   |     |     |
| <b>Shanxi</b>  | Datong   | Lingqiu   | 2   | 2   | 224 |
|                | Jincheng | Zezhou    | 1   | 1   |     |
|                | Linfen   | Yaodu     | 1   | 1   |     |
|                | Luliang  | Wenshui   | 1   | 1   |     |
|                | Taiyuan  | Xiaodian  | 1   | 2   |     |
|                |          | Wanbailin | 1   |     |     |
|                | Xinzhou  | Hequ      | 213 | 215 |     |
|                |          | Dingxiang | 1   |     |     |
|                |          | -         | 1   |     |     |
|                | Yuncheng | Hejin     | 1   | 1   |     |
|                | -        | -         | 1   | 1   |     |
| <b>Shaanxi</b> | Ankang   | Hanbin    | 2   | 4   | 43  |
|                |          | Baihe     | 2   |     |     |
|                | Baoji    | Fufeng    | 1   | 4   |     |
|                |          | Fengxiang | 1   |     |     |
|                |          | -         | 2   |     |     |
|                | Shangluo | Shanyang  | 1   | 3   |     |
|                |          | -         | 2   |     |     |
|                | Weinan   | Linwei    | 1   | 1   |     |
|                | Xi'an    | Yanta     | 12  | 27  |     |
|                |          | Lantian   | 1   |     |     |
|                |          | Lianhu    | 2   |     |     |
|                |          | Weiyang   | 4   |     |     |
|                |          | Beilin    | 2   |     |     |
|                |          | Chang'an  | 3   |     |     |
|                |          | Baqiao    | 1   |     |     |
|                |          | Xincheng  | 1   |     |     |
|                |          | -         | 1   |     |     |
|                | Xianyang | Yangling  | 1   | 1   |     |
|                | Yan'an   | Baota     | 2   | 2   |     |
|                | Yulin    | Fugu      | 1   | 1   |     |

|                 |           |           |     |     |     |
|-----------------|-----------|-----------|-----|-----|-----|
| <b>Shanghai</b> | Shanghai  | Baoshan   | 1   | 50  | 50  |
|                 |           | Fengxian  | 1   |     |     |
|                 |           | Hongkou   | 2   |     |     |
|                 |           | Huangpu   | 1   |     |     |
|                 |           | Jiading   | 2   |     |     |
|                 |           | Minhang   | 4   |     |     |
|                 |           | Pudong    | 23  |     |     |
|                 |           | Putuo     | 2   |     |     |
|                 |           | Qingpu    | 2   |     |     |
|                 |           | Songjiang | 2   |     |     |
|                 |           | Xuhui     | 1   |     |     |
|                 |           | Yangpu    | 5   |     |     |
|                 |           | Changning | 4   |     |     |
|                 |           |           |     |     |     |
| <b>Sichuan</b>  | Ngawa     | Barkam    | 1   | 1   | 537 |
|                 | Chengdu   | Shuangliu | 6   | 12  |     |
|                 |           | Xindu     | 1   |     |     |
|                 |           | Jinjiang  | 1   |     |     |
|                 |           | Chongzhou | 1   |     |     |
|                 |           | -         | 3   |     |     |
|                 | Dazhou    | Dachuan   | 3   | 288 |     |
|                 |           | Quxian    | 12  |     |     |
|                 |           | Xuanhan   | 268 |     |     |
|                 |           | Wanyuan   | 1   |     |     |
|                 |           | Dazhu     | 2   |     |     |
|                 |           | -         | 2   |     |     |
|                 | Garzê     | Kangding  | 1   | 3   |     |
|                 |           | Danba     | 1   |     |     |
|                 |           | -         | 1   |     |     |
|                 | Guangyuan | Jiange    | 1   | 1   |     |
|                 | Liangshan | Yanyuan   | 1   | 220 |     |
|                 |           | Ningnan   | 1   |     |     |
|                 |           | Yanyuan   | 218 |     |     |
|                 | Meishan   | Renshou   | 1   | 1   |     |
|                 | Mianyang  | Fucheng   | 1   | 2   |     |
|                 |           | Santai    | 1   |     |     |
|                 | Nanchong  | Nanbu     | 2   | 2   |     |
|                 | Panzhihua | Western   | 1   | 1   |     |
|                 | Yibin     | Changning | 1   | 4   |     |
|                 |           | Junlian   | 1   |     |     |
|                 |           | -         | 2   |     |     |
|                 | Ziyang    | Anyue     | 1   | 1   |     |
|                 | -         | -         | 1   | 1   |     |
|                 |           |           |     |     |     |
| <b>Tianjin</b>  | Tianjin   | Baodi     | 1   | 40  | 40  |
|                 |           |           |     |     |     |

|                 |          |            |     |     |     |
|-----------------|----------|------------|-----|-----|-----|
|                 |          | Beichen    | 6   |     |     |
|                 |          | Heping     | 3   |     |     |
|                 |          | Hebei      | 1   |     |     |
|                 |          | Hedong     | 7   |     |     |
|                 |          | Hexi       | 5   |     |     |
|                 |          | Jizhou     | 2   |     |     |
|                 |          | Jinghai    | 3   |     |     |
|                 |          | Jinnan     | 1   |     |     |
|                 |          | Xiqing     | 1   |     |     |
|                 |          | Ninghe     | 3   |     |     |
|                 |          | Nankai     | 6   |     |     |
|                 |          | -          | 1   |     |     |
| <b>Tibet</b>    | Changdu  | Chagyab    | 21  | 21  | 103 |
|                 | Lhasa    | -          | 26  | 26  |     |
|                 | Nagqu    | Shenzha    | 1   | 55  |     |
|                 |          | Biru       | 1   |     |     |
|                 |          | -          | 53  |     |     |
|                 | Shannan  | Nagarzê    | 1   | 1   |     |
| <b>Xinjiang</b> | Aksu     | Awat       | 1   | 243 | 355 |
|                 |          | -          | 242 |     |     |
|                 | Karamay  | Dushanzi   | 2   | 3   |     |
|                 |          | -          | 1   |     |     |
|                 | Urumqi   | -          | 3   | 3   |     |
|                 | Ili      | He Cheng   | 103 | 103 |     |
|                 | -        | -          | 3   | 3   |     |
|                 |          |            |     |     |     |
| <b>Yunnan</b>   | Baoshan  | Tengchong  | 1   | 2   | 45  |
|                 |          | -          | 1   |     |     |
|                 | Chuxiong | Nanhua     | 1   | 1   |     |
|                 | Dali     | Eryuan     | 2   | 6   |     |
|                 |          | Yongping   | 1   |     |     |
|                 |          | Heqing     | 1   |     |     |
|                 |          | -          | 2   |     |     |
|                 | Dehong   | Lianghe    | 1   | 1   |     |
|                 | Diqing   | Shangri-La | 4   | 4   |     |
|                 | Honghe   | Shiping    | 2   | 5   |     |
|                 |          | Mengzi     | 1   |     |     |
|                 |          | -          | 2   |     |     |
|                 | Kunming  | Anning     | 1   | 7   |     |
|                 |          | Xishan     | 1   |     |     |
|                 |          | -          | 5   |     |     |
|                 | Lincang  | Fengqing   | 1   | 2   |     |
|                 |          | -          | 1   |     |     |
|                 | Pu'er    | -          | 1   | 1   |     |

|                  |           |            |    |    |     |
|------------------|-----------|------------|----|----|-----|
|                  | Qujing    | Fuyuan     | 1  | 4  |     |
|                  |           | Xuanwei    | 1  |    |     |
|                  |           | -          | 2  |    |     |
|                  | Wenshan   | Qiubei     | 7  | 9  |     |
|                  |           | Yanshan    | 1  |    |     |
|                  |           | Wenshan    | 1  |    |     |
|                  | Zhaotong  | Zhaoyang   | 1  | 3  |     |
|                  |           | Yongshan   | 1  |    |     |
|                  |           | Yiliang    | 1  |    |     |
| <b>Zhejiang</b>  | Hangzhou  | Riverside  | 2  | 90 | 129 |
|                  |           | Gongshu    | 1  |    |     |
|                  |           | Shangcheng | 1  |    |     |
|                  |           | Jianggan   | 5  |    |     |
|                  |           | Tonglu     | 63 |    |     |
|                  |           | Xihu       | 5  |    |     |
|                  |           | Xiacheng   | 3  |    |     |
|                  |           | Xiaoshan   | 2  |    |     |
|                  |           | Yuhang     | 4  |    |     |
|                  |           | -          | 4  |    |     |
|                  | Jiaxing   | Xiuzhou    | 1  | 7  |     |
|                  |           | Haining    | 3  |    |     |
|                  |           | Haiyan     | 2  |    |     |
|                  |           | Tongxiang  | 1  |    |     |
|                  | Jinhua    | Pan'an     | 1  | 2  |     |
|                  |           | -          | 1  |    |     |
|                  | Ningbo    | Yuyao      | 1  | 6  |     |
|                  |           | Cixi       | 1  |    |     |
|                  |           | Jiangbei   | 1  |    |     |
|                  |           | Zhenhai    | 1  |    |     |
|                  |           | Haishu     | 1  |    |     |
|                  |           | -          | 1  |    |     |
|                  | Quzhou    | Jiangshan  | 7  | 8  |     |
|                  |           | Kecheng    | 1  |    |     |
|                  | Shaoxing  | Yuecheng   | 1  | 12 |     |
|                  |           | Zhuji      | 10 |    |     |
|                  |           | -          | 1  |    |     |
|                  | Taizhou   | Tiantai    | 1  | 2  |     |
|                  |           | Huangyan   | 1  |    |     |
|                  | Wenzhou   | Ruian      | 1  | 2  |     |
|                  |           | Yueqing    | 1  |    |     |
| <b>Chongqing</b> | Chongqing | Beibei     | 1  | 73 | 73  |
|                  |           | Dianjiang  | 1  |    |     |
|                  |           | Dazu       | 1  |    |     |



---

|           |    |
|-----------|----|
| Hechuan   | 1  |
| Fengjie   | 3  |
| Jiangbei  | 1  |
| Kaizhou   | 1  |
| Pengshui  | 3  |
| Nan'an    | 12 |
| Qijiang   | 1  |
| Qianjiang | 7  |
| Shizhu    | 1  |
| Shapingba | 3  |
| Tongnan   | 1  |
| Wanzhou   | 15 |
| Xiushan   | 4  |
| Yongchuan | 1  |
| Youyang   | 4  |
| Yubei     | 5  |
| Yuzhong   | 2  |
| Yunyang   | 1  |
| -         | 4  |

---

*Note:* “-” denotes that the respondents refused to disclose their location.

## **Supplementary File S1**

### **Questionnaire on researching personal environmental and ecological perception**

Investigator:

Research Date:

(Note: Respondents need to answer based on their own local actual conditions and their own perceptions. The investigators ensure that the respondent's sensitive information will be kept strictly confidential)

#### **Part A Basic information of the respondents**

1. Gender: 0. Male; 1. Female;
2. Age: 1. Under 30 years old; 2. Between 31-50 years old; 3. Above 50 years old
3. Nationality: \_\_\_\_\_
4. Education level: 1. Primary school or below 2. Middle school 3. High school 4. College or university 5. Master degree or above;
5. Family size: \_\_\_\_\_ persons;
6. Type of household registration: 0. Agricultural Hukou; 1. Non-agricultural Hukou;
7. Address: \_\_\_\_\_ Town (township) \_\_\_\_\_ Village, \_\_\_\_\_ County, \_\_\_\_\_ City, \_\_\_\_\_ Province

#### **Part B Respondents' overall views on environmental pollution**

1. Do you think there is current local environmental pollution?  
A. Yes, serious; B. Yes, not too serious; C. No; D. Don't know
2. What do you think the current local environment has changed compared to 5 years ago?  
A. Much better; B. A little better; C. Fair; D. A little worse; E. A lot worse
3. Same as question 2, how has it changed compared to 10 years ago?  
A. Much better; B. A little better; C. Fair; D. A little worse; E. A lot worse
4. What do you think is the main source of local solid pollution? (Multiple choice)  
A. Industrial solid waste; B. Agricultural solid waste; C. Medical solid waste; D. Domestic waste;

E. Other; F. Don't know

5. What is the main type of wastewater pollution locally? (Multiple choice)

A. Industrial wastewater; B. Agricultural wastewater; C. Domestic wastewater; D. Others; E. Don't know

6. Do you think there is ecological or environmental damage at present?

A. Yes, serious; B. Yes, not too serious; C. No; D. Don't know

7. Do you think the current environment has an impact on your life?

A. Yes, serious; B. Yes, not serious; C. No effect; D. It doesn't matter

8. Submission question 7, if there is an impact, which aspects of you have been mainly affected? (Multiple choice)

A. Willingness to buy a house; B. Work; C. Mood; D. Leisure; E. Health; F. Others (specify) \_\_\_\_\_

9. What do you think the current local government's environmental protection is doing?

A. Very good; B. Relatively good; C. Average; D. Not very good; E. Very poor; F. No protection at all; G. Don't know

10. What do you think the local environment will be like in the next three years?

A. It has become much better than it is now; B. It has become better than it is now; C. There would be no change; D. It would become a little worse than present; E. It would become really worse than present; F. Don't know

11. How confident are you that local environmental conditions will improve?

A. Very confident; B. Relatively confident; C. Average; D. Not so confident; E. Not confident at all

12. Do you think the local government will increase investment in environmental governance in the future?

A. Yes; B. No; C. Don't know

13. Where do you think the government should start to manage the environment first?

A. Residents' living environment; B. Regional ecological environment; C. Don't know

14. What do you think of the current local comprehensive environmental situation?

A. Very good; B. Relatively good; C. Average; D. Not very good; E. Very poor

### **Part C Respondents' specific understanding of the environment (Ellipsis)**

### **Part D Respondents' perceptions of happiness and health**

1. How happy do you think your life is?

A. Very happy; B. Relatively happy; C. Average; D. Not very happy; E. Very unhappy

2. What do you think of your health status at present?

A. Very healthy; B. Relatively healthy; C. Average; D. Not very healthy; E. Very unhealthy

3. Compared to the last year, how do you evaluate your current health status?

A. Better; B. No change; C. Worse

4. Compared to your peers, how do you evaluate your current health status?

A. Better than their peers; B. About the same; C. Worse than their peers

### **5-7 (Ellipsis)**

8. Do you think the morning of the day is the best?

A. Always; B. Often; C. Sometimes; D. Occasionally; E. Never

9. Do you cry or feel like crying?

A. Always; B. Often; C. Sometimes; D. Occasionally; E. Never

10. Do you often feel sullen and depressed?

A. Always; B. Often; C. Sometimes; D. Occasionally; E. Never

11. Do you often have trouble sleeping?

A. Always; B. Often; C. Sometimes; D. Occasionally; E. Never

12. Are you fatigued with no reason?

A. Always; B. Often; C. Sometimes; D. Occasionally; E. Never

13. Do you find it easy to do things you often do?

A. Always; B. Often; C. Sometimes; D. Occasionally; E. Never

14. Are you feeling upset and find it difficult to calm down?

A. Always; B. Often; C. Sometimes; D. Occasionally; E. Never

15. Do you find it easy to make a decision?

A. Always; B. Often; C. Sometimes; D. Occasionally; E. Never

16. You feel like a useful person, does anyone need you?

A. Always; B. Often; C. Sometimes; D. Occasionally; E. Never

17. Do you think your life is very interesting?

A. Always; B. Often; C. Sometimes; D. Occasionally; E. Never

*Note:* Due to the request of financial founders, we could only release several parts of questions (or some questions in a part) that involves in our research, namely, the Question Part of respondents' socioeconomic information, the individual's views on environmental pollution, and the individual evaluation of health status and subjective wellbeing.
